# Supplementary material for: Intercropping of Leguminous and Non-Leguminous Desert Plant Species Does Not Facilitate Phosphorus Mineralization and Plant Nutrition
Source: MDPI journal article supplement (doi:10.3390/cells11060998), 2022-03-15
Supplement: s1 [file s1]

# **Intercropping of leguminous and non-leguminous desert plant species does not facilitate phosphorus mineralization and plants nutrition**

Akash Tariq<sup>1,2,3,4\*†</sup>, Jordi Sardans<sup>5,6</sup>, Josep Peñuelas<sup>5,6</sup>, Zhihao Zhang<sup>1,2,3†</sup>, Corina Graciano<sup>7†</sup>, Fanjiang Zeng<sup>1,2,3\*</sup>, Olusanya

Abiodun Olatunji<sup>8</sup>, Abd Ullah<sup>1,2,3,4</sup>, Kaiwen Pan<sup>8</sup>

<sup>1</sup>Xinjiang Desert Plant Roots Ecology and Vegetation Restoration Laboratory, Xinjiang Institute of Ecology and Geography, Chinese Academy of Sciences

<sup>2</sup>State Key Laboratory of Desert and Oasis Ecology, Xinjiang Institute of Ecology and Geography, Chinese Academy of Sciences, Urumqi, China

<sup>3</sup>Cele National Station of Observation and Research for Desert-Grassland Ecosystems, Cele, China

<sup>4</sup>University of Chinese Academy of Sciences, Beijing, China

<sup>5</sup>CSIC, Global Ecology Unit, CREAM-CSIC-UAB, Bellaterra, 08193 Barcelona, Catalonia, Spain

<sup>6</sup>CREAF, Cerdanyola del Vallès 08193, Catalonia, Spain

<sup>7</sup>Instituto de Fisiología Vegetal, Consejo Nacional de Investigaciones Científicas y Técnicas, Universidad Nacional de La Plata, Buenos Aires, Argentina

<sup>8</sup>CAS Key Laboratory of Mountain Ecological Restoration and Bioresource Utilization and Ecological Restoration Biodiversity Conservation Key Laboratory of Sichuan Province, Chengdu Institute of Biology, Chinese Academy of Sciences, Chengdu-610041, Sichuan, China

\*Corresponding authors

akash.malik786@mailsucas.ac.cn; zengfj@ms.xjb.ac.cn

†Equal Contribution

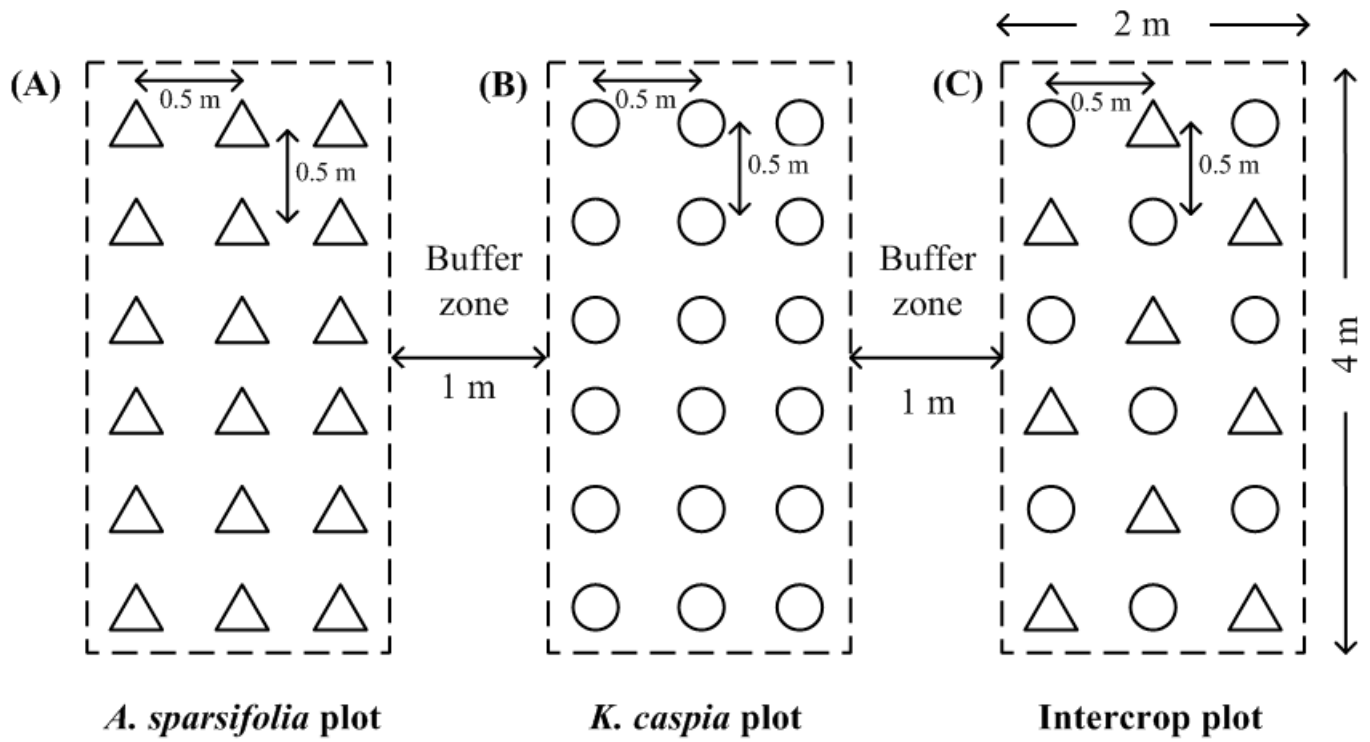

**Fig. S1** Experimental design. Panels(A) and (B) show the monoculture plots of *A. sparsifolia* and *K. caspia*, respectively, and panel (C) shows their intercrop pattern. The triangle and circle represent the *A. sparsifolia* and *K. caspia*, respectively.

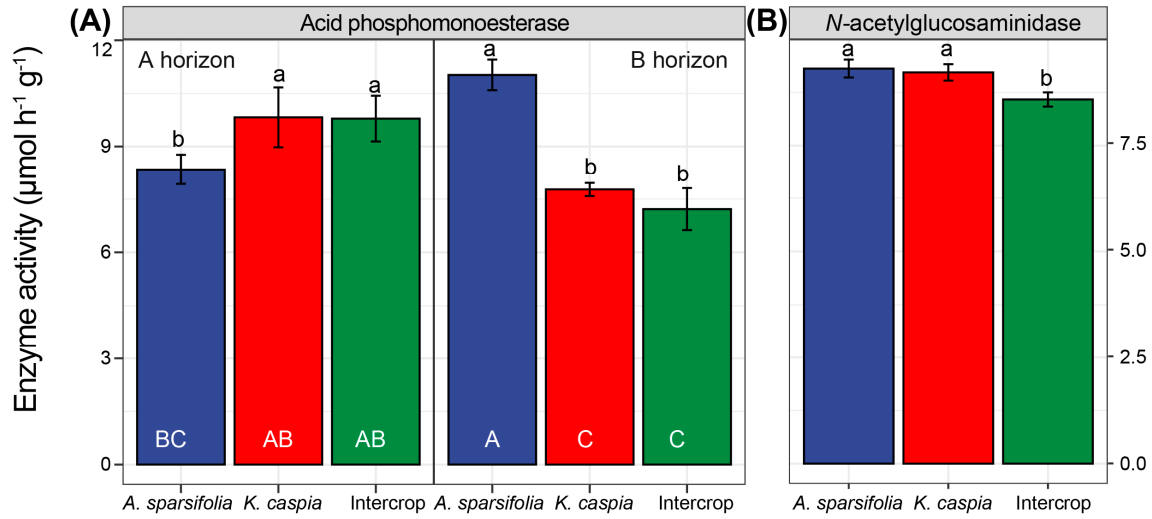

**Fig. S2** The activities of (A) acid phosphomonoesterase in the two soil layers in different plant patterns and (B) N-acetylglucosaminidase in different plant patterns. Values are means  $\pm$  SE. Different capital letters below the bars indicate significant differences at  $P < 0.05$  among six treatments, and lowercase letters above error bars indicate significant differences at  $P < 0.05$  from different planting patterns (in each soil layer).

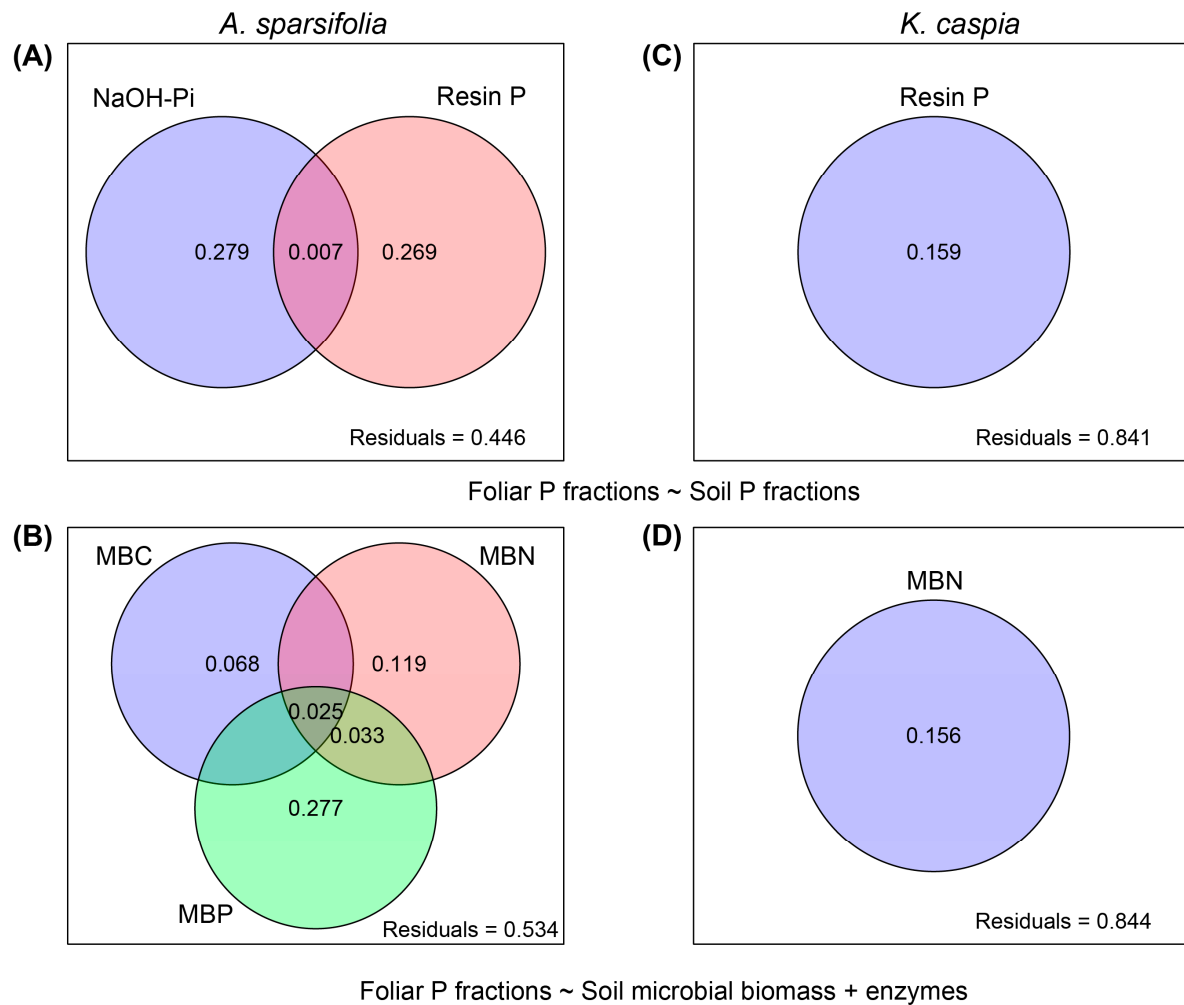

**Fig. S3** The foliar P fraction variance explained by soil properties according to redundancy analysis (RDA). Subplots A-B show the results from *A. sparsifolia* monoculture and its intercropping pattern plots; subplots C-D show the results from *K. caspia* monoculture and its intercropping pattern plots;
